# Supplementary material
Source: PubMed Central journal article supplement (PMC7202960)
Supplement: NIHMS1572058-supplement-1.pdf [file NIHMS1572058-supplement-1.pdf]

**Supplementary Table 1:** Association between ER/PR/HER2 defined groups and European genetic ancestry (for every 10% increase)

| Covariates            | Subtype      | N   | OR   | 95% CI    | P-value |
|-----------------------|--------------|-----|------|-----------|---------|
| <i>By HER2 status</i> |              |     |      |           |         |
| Univariate            | HER2-        | 837 | Ref. |           |         |
|                       | HER2+        | 392 | 0.91 | 0.82-1.01 | 0.081   |
| Age dx + Afr + Height | HER2-        | 688 | Ref. |           |         |
|                       | HER2+        | 335 | 0.88 | 0.77-1.00 | 0.044   |
| Univariate            | ER/PR+ HER2- | 638 | Ref. |           |         |
|                       | ER/PR- HER2+ | 156 | 0.81 | 0.69-0.96 | 0.013   |
|                       | ER/PR+ HER2+ | 239 | 0.94 | 0.82-1.06 | 0.310   |
|                       | ER/PR/HER2-  | 200 | 0.89 | 0.78-1.03 | 0.122   |
| Age dx + Afr + Height | ER/PR+ HER2- | 531 | Ref. |           |         |
|                       | ER/PR- HER2+ | 129 | 0.81 | 0.66-0.98 | 0.035   |
|                       | ER/PR+ HER2+ | 209 | 0.91 | 0.78-1.06 | 0.240   |
|                       | ER/PR/HER2-  | 158 | 0.96 | 0.81-1.13 | 0.633   |

**Age dx:** age at diagnosis; **Afr:** African genetic ancestry proportion
