# Supplementary material
Source: PubMed Central journal article supplement (PMC7202960)
Supplement: NIHMS1572058-supplement-2.pdf [file NIHMS1572058-supplement-2.pdf]

**Supplementary Table 2:** Association between ER/PR/HER2 defined groups and Indigenous American genetic ancestry including stage and region of residence as covariates

| <b>Covariates</b>                                         | <b>Subtype</b> | <b>N</b> | <b>OR</b> | <b>95% CI</b> | <b>P-value</b> |
|-----------------------------------------------------------|----------------|----------|-----------|---------------|----------------|
| Age dx + Afr + Height<br>+ Stage + Region of<br>residence | ER/PR+ HER2-   | 457      | Ref.      |               |                |
|                                                           | ER/PR- HER2+   | 111      | 1.30      | 1.08-1.57     | 0.005          |
|                                                           | ER/PR+ HER2+   | 170      | 1.14      | 0.99-1.31     | 0.079          |
|                                                           | ER/PR/HER2-    | 135      | 1.14      | 0.98-1.34     | 0.097          |

**Age dx:** age at diagnosis; **Afr:** African genetic ancestry proportion; **Stage:** stage at diagnosis
